# Supplementary material for: Potential benefit of bosentan therapy in borderline or less severe pulmonary hypertension secondary to idiopathic pulmonary fibrosis—an interim analysis of results from a prospective, single-center, randomized, parallel-group study
Source: BMC Pulm Med. 2017 Dec 13;17:200. doi: 10.1186/s12890-017-0523-2 (PMC5729252; doi:10.1186/s12890-017-0523-2)
Supplement: Supplementary file 6 — Figure S3 Schedule for evaluation of parameters in this study. (PDF 1240 kb) [file 12890_2017_523_MOESM6_ESM.pdf]

**Supplementary Figure 3**

| Item                                           |                                | Run-in period  | Start of treatment                              | Treatment period (24 months) |        |        |                |                                 |
|------------------------------------------------|--------------------------------|----------------|-------------------------------------------------|------------------------------|--------|--------|----------------|---------------------------------|
| Time                                           |                                | Weeks -0 to -2 | Week 0 (For untreated group, 2 weeks after RHC) | (Week 1)                     | Week 2 | Week 4 | Week 8 onwards |                                 |
|                                                |                                |                |                                                 |                              |        |        | Every 4 weeks  | At completion (discontinuation) |
| Informed consent                               |                                | ○              |                                                 |                              |        |        |                |                                 |
| Patient background                             |                                | ○              |                                                 |                              |        |        |                |                                 |
| Study drug administration (Drug to treat PAH)* |                                |                | ←                                               |                              |        |        |                | →                               |
| Subjective and objective symptoms              |                                | ○              | ○                                               | ○                            | ○      | ○      | ○              | ○                               |
| Monitoring for adverse events                  |                                |                | ←                                               |                              |        |        |                | →                               |
| Blood pressure                                 |                                | ○              |                                                 |                              | ○*     | ○      | ○              | ○                               |
| Pulse rate                                     |                                | ○              |                                                 |                              | ○*     | ○      | ○              | ○                               |
| Body weight                                    |                                | ○              |                                                 |                              |        |        | ○              | ○                               |
| Laboratory tests                               | Hematology                     | ○              |                                                 |                              | ○*     | ○*     | ○              | ○                               |
|                                                | Biochemistry (NT-proBNP, etc.) | ○              |                                                 |                              | ○*     | ○*     | ○              | ○                               |
|                                                | Urinalysis                     | ○              |                                                 |                              |        | ○*     | ○              | ○                               |
| Chest X-ray                                    |                                | ○              |                                                 |                              |        | ○      | ○              | ○                               |
| ECG                                            |                                | ○              |                                                 |                              |        |        | ○              |                                 |
| Echocardiography                               |                                | ○              |                                                 |                              |        |        | ○              | ○                               |
| RHC                                            |                                | ○              |                                                 |                              |        |        | ○              |                                 |
| ADL                                            |                                | ○              | ○                                               |                              |        |        | ○              | ○                               |
| Exercise stress testing                        |                                | ○              |                                                 |                              |        |        | ○              | ○                               |
| PFT                                            |                                | ○              |                                                 |                              |        |        | ○              | ○                               |
| Arterial blood analysis                        |                                | ○              |                                                 |                              |        |        | ○              | ○                               |

\*To be conducted only in patients given the study drug
